# Supplementary material for: Treatment of Atopic Dermatitis Using a Full-Body Blue Light Device (AD-Blue): Protocol of a Randomized Controlled Trial
Source: PubMed Central journal article supplement (PMC6329412; doi:10.2196/11911), 2019-01-08
Supplement: resprot_v8i1e11911_app2.pdf [file resprot_v8i1e11911_app2.pdf]

**Multimedia Appendix 2.** Study schedule of assessments.

| Visit No.                                 | Treatment |   |   |   |   |   |   |   |   |   |    |    |    |    |    |    |    |    |    |    |    |    |    |    |    |                |   |   |
|-------------------------------------------|-----------|---|---|---|---|---|---|---|---|---|----|----|----|----|----|----|----|----|----|----|----|----|----|----|----|----------------|---|---|
|                                           | Screening | 1 | 2 | 3 | 4 | 5 | 6 | 7 | 8 | 9 | 10 | 11 | 12 | 13 | 14 | 15 | 16 | 17 | 18 | 19 | 20 | 21 | 22 | 23 | 24 | Follow-up (25) |   |   |
| Week                                      |           | 1 |   |   | 2 |   |   | 3 |   |   | 4  |    |    | 5  |    |    | 6  |    |    | 7  |    |    | 8  |    |    | 12             |   |   |
| Irradiation                               |           | X | X | X | X | X | X | X | X | X | X  | X  | X  | X  | X  | X  | X  | X  | X  | X  | X  | X  | X  | X  | X  | X              |   |   |
| DLQI <sup>a</sup>                         |           | X |   |   |   |   |   | X |   |   |    |    |    | X  |    |    |    |    |    | X  |    |    |    |    |    | X              | X |   |
| Photos                                    |           | X |   |   |   |   |   |   |   |   |    |    |    |    |    |    |    |    |    |    |    |    |    |    |    | X              | X |   |
| Itch VAS <sup>b</sup>                     |           | X |   |   |   |   |   | X |   |   | X  |    |    | X  |    |    | X  |    |    | X  |    |    |    |    |    | X              | X |   |
| SCORAD <sup>c</sup>                       |           | X |   |   |   |   |   | X |   |   |    |    |    | X  |    |    |    |    |    | X  |    |    |    |    |    | X              | X |   |
| IGA <sup>d</sup>                          |           | X |   |   |   |   |   | X |   |   |    |    |    | X  |    |    |    |    |    | X  |    |    |    |    |    | X              | X |   |
| EASI <sup>e</sup>                         | X         | X |   |   |   |   |   | X |   |   |    |    |    | X  |    |    |    |    |    | X  |    |    |    |    |    | X              | X |   |
| PO-SCORAD <sup>f</sup>                    |           | X |   |   |   |   |   | X |   |   | X  |    |    | X  |    |    | X  |    |    | X  |    |    |    |    |    | X              | X |   |
| Adverse events                            |           | X | X | X | X | X | X | X | X | X | X  | X  | X  | X  | X  | X  | X  | X  | X  | X  | X  | X  | X  | X  | X  | X              | X | X |
| Blood pressure                            | X         | X |   |   |   |   |   | X |   |   |    |    |    | X  |    |    |    |    |    | X  |    |    |    |    |    | X              | X |   |
| Fitzpatrick skin type                     |           | X |   |   |   |   |   |   |   |   |    |    |    |    |    |    |    |    |    |    |    |    |    |    |    |                |   |   |
| differential blood count                  | X         | X |   |   |   |   |   | X |   |   |    |    |    | X  |    |    |    |    |    | X  |    |    |    |    |    | X              | X |   |
| IgE, sx1, HIV, Hep B/C, preg test (serum) | X         |   |   |   |   |   |   |   |   |   |    |    |    |    |    |    |    |    |    |    |    |    |    |    |    |                |   |   |
| Patient- and disease-related info         |           | X |   |   |   |   |   |   |   |   |    |    |    |    |    |    |    |    |    |    |    |    |    |    |    | X              |   |   |
| Mexameter pigmentation                    |           | X |   |   |   |   |   |   |   |   |    |    |    | X  |    |    |    |    |    |    |    |    |    |    |    | X              |   |   |

Abbreviations: <sup>a</sup> Dermatology Life Quality Index, <sup>b</sup> Visual Analogue Scale, <sup>c</sup> SCORing Atopic Dermatitis,

<sup>d</sup> Investigator Global Assessment, <sup>e</sup> Eczema Area and Severity Index, <sup>f</sup> Patient oriented SCORing Atopic Dermatitis.

Procedures with green background will be performed by the blinded investigator, procedures in red will be performed by the study nurse.
